# Supplementary material for: Hole-transport-material-free perovskite solar cells based on nanoporous gold back electrode
Source: Royal Society of Chemistry journal article supplement (doi:10.1039/c5ra11720h), 2015-01-01
Supplement: c5ra11720h1.pdf [file c5ra11720h1.pdf]

## Electronic Supplementary Information

### Hole-Transport-Material-Free Perovskite Solar Cells Based on Nanoporous Gold Back Electrode

Xiaoxin Zhou<sup>a</sup>, Chunxiong Bao<sup>a</sup>, Faming Li<sup>a</sup>, Hao Gao<sup>a</sup>, Tao Yu<sup>\*a b c</sup>, Jie Yang<sup>a</sup>, Weidong Zhu<sup>a</sup> and Zhigang Zou<sup>a b c</sup>

<sup>a</sup>. National Laboratory of Solid State Microstructures & Eco-Materials and Renewable Energy Research Center (ERERC) at Department of Physics, Nanjing University, Nanjing 210093, P. R. China. E-mail: yutao@nju.edu.cn

<sup>b</sup>. Collaborative Innovation Center of Advanced Microstructures, Nanjing University, Nanjing 210093, P.R.China

<sup>c</sup>. Jiangsu Key Laboratory for Nano Technology, Nanjing 210093, P.R.China

#### Materials

Hydroiodic acid (57 wt % in water, 99.99%) and methylamine (33 wt % in absolute ethanol) were purchased from Sigma-Aldrich. N,N-dimethylformamide (DMF, anhydrous 99.5%, Aladdin) and lead iodide (PbI<sub>2</sub>) (99.999%) were purchased from Aladdin Reagents. Titanium diisopropoxide bis(acetylacetonate) solution (75% in 2-propanol) was purchased from Alfa Aesar. All of the used reagents were analytical grade, without further purification. The 12 carat 100 nm thick white-gold decorative films with 1:1 weight ratio of Ag/Au was purchased from Seep Leaf Products (New York), which used as the raw material of NPG. CH<sub>3</sub>NH<sub>3</sub>I was synthesized according to a literature.<sup>1</sup>

#### NPG fabrication

The Ag/Au alloy leaf was first tailored into suitable size. Then, the small leaf was transferred to deionized water to conserve using a glass. Transfer the leaf from deionized water to 68% HNO<sub>3</sub> by a glass and etched in HNO<sub>3</sub> for 20 min. After that,

the NPG was obtained and then transferred to deionized water to remove the residual  $\text{HNO}_3$  for several hours before use.

### **Solar cells fabrication**

The fluorine-doped tin oxide (FTO) glass was etched by Zn powder and 10% HCl. Then the FTO was ultrasonic cleaned with detergent, deionized water, ethanol and acetone. After that the glass was treated in an ultraviolet-ozone cleaner for 30 min. A compact  $\text{TiO}_2$  layer was prepared on the cleaned FTO glass by aerosol spray pyrolysis using a commercial titanium diisopropoxide bis (acetylacetonate) solution (75% in 2-propanol) diluted in ethanol (1:25, volume ratio) at 450 °C, and annealed at 500 °C for 30 min. After cooling down to room temperature, a mesoporous  $\text{TiO}_2$  layer was spin-coated at 5,000 r.p.m for 30 s using commercial  $\text{TiO}_2$  paste diluted in ethanol at weight ratio 2:7. The film was dried at 125 °C for 30 min and then heated at 500 °C for 30 min. An  $\text{Al}_2\text{O}_3$  blacking layer was spin-coated on the mesoporous  $\text{TiO}_2$  at 5000 r.p.m for 60 s using a commercial  $\text{Al}_2\text{O}_3$  paste, the annealing process is the same as mesoporous  $\text{TiO}_2$ . After that, the NPG was transferred onto the as-prepared substrate by using the substrate instead of the glass to salvage. Before deposition  $\text{CH}_3\text{NH}_3\text{PbI}_3$ , the substrate was dried for several hours to remove the water completely.  $\text{CH}_3\text{NH}_3\text{PbI}_3$  were infiltrated in the pores by different ways. For one-step spin-coating deposition, 1 mol/L  $\text{CH}_3\text{NH}_3\text{PbI}_3$  in N,N-dimethylformamide (DMF) was load on the substrate for 60 s, and then spinning at 3000 r.p.m for 30 s. The device was completed after annealing at 90 °C for 30 min. For sequential deposition and two-step spin-coating process, 1 mol/L  $\text{PbI}_2$  solution in DMF was loaded on the substrate for 30 s, then spinning at 4500 r.p.m for 60 s at 70 °C, dried at 90 °C for 5 min. After cooling to room temperature, the substrate was dip in 12 mg/ml  $\text{CH}_3\text{NH}_3\text{I}$  solution in isopropanol for 2 min or 12 mg/ml  $\text{CH}_3\text{NH}_3\text{I}$  solution in isopropanol was loaded on the  $\text{PbI}_2$  for 20 s, then spinning at 2000 r.p.m for 30 s, respectively. After that, the sample was annealed at 90 °C for 30 min.

## **Characterization**

X-Ray diffraction (XRD) patterns were collected on a Rigaku Ultima III X-ray diffractometer (Cu K $\alpha$ ) in the range of 10°-60°. A FEI NOVA NanoSEM230 scanning electron microscopy (SEM) was employed to characterize the top surface morphological of all samples. The J–V testing of the HTM-free perovskite solar cells employed a Keithley 2400 source measure unit under AM 1.5 illumination cast by an Oriel 92251A-1000 sunlight simulator

## **Notes and references**

1. J. H. Im, C. R. Lee, J. W. Lee, S. W. Park and N. G. Park, *Nanoscale*, 2011, **3**, 4088-4093.
